# Supplementary material for: The Value of Serum Immunoglobulin G Glycome in the Preoperative Discrimination of Peritoneal Metastasis from Advanced Gastric Cancer
Source: PubMed Central journal article supplement — J Cancer. 2019 Jun 2;10(12):2811–21. doi: 10.7150/jca.31380 (PMC6584920; doi:10.7150/jca.31380), 2019-06-02
Supplement: jcav10p2811s1.pdf [file jcav10p2811s1.pdf]

**Supplementary Table**

**Supplementary Table 1**

**Compositions of 24 directly measured glycan peaks by UPLC**

| Glycan peak | Composition | Proposed Structure |
|-------------|-------------|--------------------|
| GP1         | H3N3F1      |                    |
| GP2         | H3N4        |                    |
| GP3         | H3N5        |                    |
| GP4         | H3N4F1      |                    |
| GP5         | H5N2        |                    |
| GP6         | H3N5F1      |                    |
| GP7         | H4N4        |                    |

|      |           |                                                                                     |
|------|-----------|-------------------------------------------------------------------------------------|
| GP8  | H4N4F1(6) | 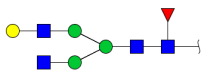   |
| GP9  | H4N4F1(3) |    |
| GP10 | H4N5F1(6) |    |
| GP11 | H4N5F1(3) |    |
| GP12 | H5N4      |    |
| GP13 | H5N5      |    |
| GP14 | H5N4F1    |  |
| GP15 | H5N5F1    |  |

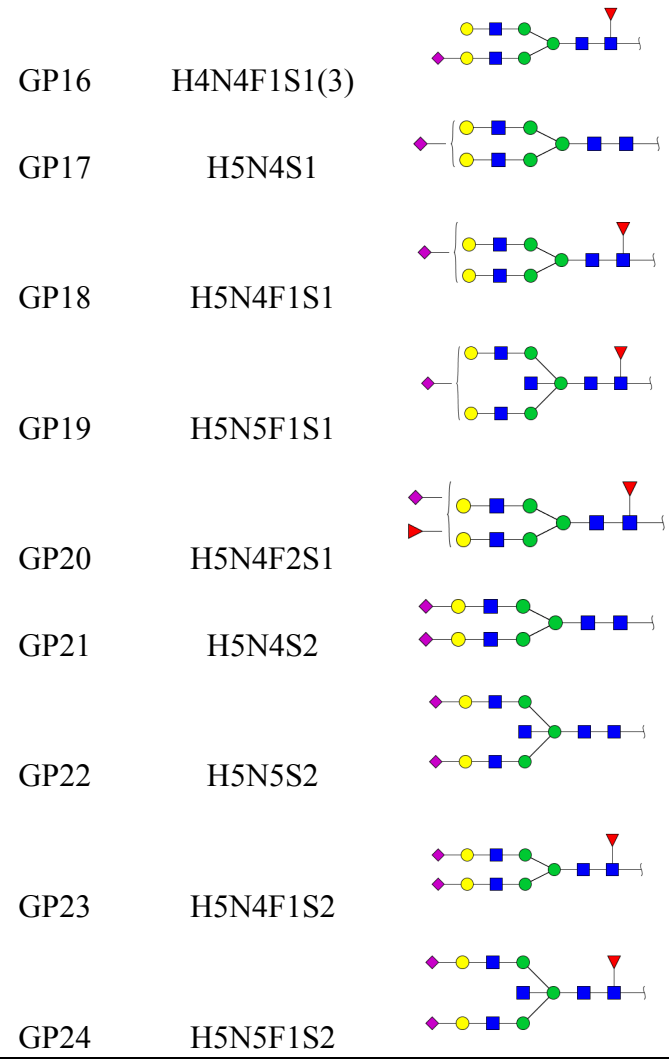

Note: H: hexose, N: N-acetylhexosamine; F: fucose, S: sialic acid.

## Supplementary Table 2

Derived glycan traits based on the glycan structure

| <b>Derived traits</b> | <b>Description</b>                                         | <b>Formula</b>                                                    |
|-----------------------|------------------------------------------------------------|-------------------------------------------------------------------|
| GPN                   | Proportion of neutral glycans in total IgG glycans         | GP1+GP2+GP3+GP4+GP5+GP6+GP7+GP8+GP9+GP10+GP11+GP12+GP13+GP14+GP15 |
| S1                    | Proportion of monosialylated glycans in total IgG glycans  | GP16+GP17+GP18+GP19                                               |
| S2                    | Proportion of disialylated glycans in total IgG glycans    | GP21+GP22+GP23+GP24                                               |
| GPS                   | Proportion of sialylated glycans in total IgG glycans      | GPS1+GPS2                                                         |
| G0                    | Proportion of agalactosylated glycans in total IgG glycans | GP1+ GP2+ GP3+ GP4+ GP6                                           |

|    |                                                                   |                                                                               |
|----|-------------------------------------------------------------------|-------------------------------------------------------------------------------|
| G1 | Proportion of monogalactosylated glycans in total IgG glycans     | GP7+ GP8+ GP9+ GP10+ GP11                                                     |
| G2 | Proportion of diagalactosylated glycans in total IgG glycans      | GP12+ GP13+ GP14+ GP15                                                        |
| F  | Proportion of fucosylated glycans in total IgG glycans            | GP1+ GP4+ GP6+ GP8+ GP9+ GP10+ GP11+ GP14+ GP15+ GP16+ GP18+ GP19+ GP23+ GP24 |
| FN | Proportion of fucosylated glycans in total neutral IgG glycans    | $(GP1+ GP4+ GP6+ GP8+ GP9+ GP10+ GP11+ GP14+ GP15)/GPN*100$                   |
| FS | Proportion of fucosylated glycans in total sialylated IgG glycans | $(GP16+ GP18+ GP19+ GP23+ GP24)/GPS*100$                                      |
| B  | Proportion of bisecting glycans in total IgG glycans              | GP3+ GP6+ GP10+ GP11+ GP13+ GP15+ GP19+ GP22+ GP24                            |

|     |                                                                                           |                                        |
|-----|-------------------------------------------------------------------------------------------|----------------------------------------|
| BN  | Proportion of bisecting glycans in neutral IgG glycans                                    | $(GP3+ GP6+ GP10+ GP11+ GP13)/GPN*100$ |
| BS  | Proportion of bisecting glycans in sialylated IgG glycans                                 | $(GP19+ GP22+ GP24)/GPS*100$           |
| FG0 | Proportion of fucosylated agalactosylated glycans in total IgG glycans (glycan peak 4)    | GP4                                    |
| FG1 | Proportion of fucosylated monogalactosylated glycans in total IgG glycans                 | GP8+GP9                                |
| FG2 | Proportion of fucosylated diagalactosylated glycans in total IgG glycans (glycan peak 14) | GP14                                   |

Gal-ratio The relative intensity of  $FG0/(FG1+FG2*2)$   
IgG fucosylated  
galactosylation

---

**Supplementary Table 3**

The sensitivity and specificity of potential glyco-biomarkers in training cohort, validation cohort and combined cohort

| Training cohort |      |              |             |             |
|-----------------|------|--------------|-------------|-------------|
|                 | AUC  | 95% CI       | Sensitivity | Specificity |
| GPN             | 0.72 | 0.65 to 0.78 | 86.36%      | 50.93%      |
| GPS             | 0.71 | 0.65 to 0.78 | 86.36%      | 50.93%      |
| S2              | 0.76 | 0.69 to 0.82 | 72.73%      | 70.81%      |
| Glyco-model     | 0.80 | 0.74 to 0.86 | 75.00%      | 73.29%      |

  

| Validation cohort |      |              |             |             |
|-------------------|------|--------------|-------------|-------------|
|                   | AUC  | 95% CI       | Sensitivity | Specificity |
| GPN               | 0.69 | 0.59 to 0.79 | 61.54%      | 68.24%      |
| GPS               | 0.69 | 0.59 to 0.79 | 48.72%      | 81.18%      |
| S2                | 0.72 | 0.62 to 0.82 | 51.28%      | 89.41%      |



|                 |      |              |             |             |
|-----------------|------|--------------|-------------|-------------|
| Glyco-model     | 0.77 | 0.68 to 0.86 | 66.67%      | 76.47%      |
| Combined cohort |      |              |             |             |
|                 | AUC  | 95% CI       | Sensitivity | Specificity |
| GPN             | 0.71 | 0.65 to 0.76 | 66.93%      | 66.26%      |
| GPS             | 0.71 | 0.65 to 0.76 | 67.72%      | 66.26%      |
| S2              | 0.74 | 0.69 to 0.80 | 68.50%      | 69.92%      |
| Glyco-model     | 0.79 | 0.74 to 0.84 | 72.44%      | 74.39%      |

**Supplementary Table 4**

The sensitivity and specificity of serum tumor biomarkers in combined cohort

|        | Combine cohort |              |             |             |
|--------|----------------|--------------|-------------|-------------|
|        | AUC            | 95% CI       | Sensitivity | Specificity |
| CEA    | 0.54           | 0.47 to 0.61 | 34.78%      | 73.33%      |
| CA19-9 | 0.63           | 0.56 to 0.70 | 45.05%      | 80.79%      |
| CA125  | 0.63           | 0.55 to 0.71 | 38.46%      | 86.84%      |
| CA72-4 | 0.62           | 0.54 to 0.70 | 47.22%      | 76.22%      |

Supplementary Figure

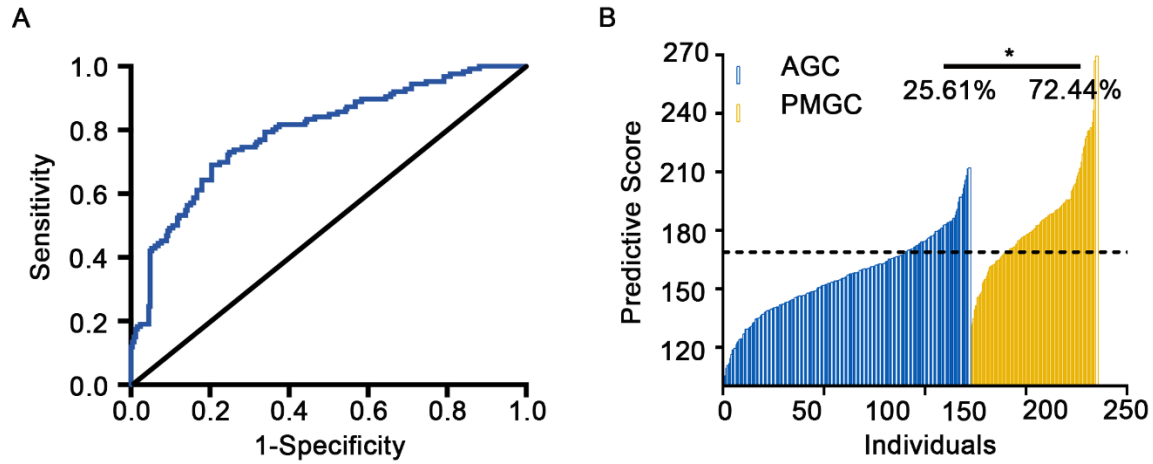

**Figure S1: Efficacy prediction of discriminate glyco-model of combined cohort.** Plots of ROC result (AUC= 0.79, 95%CI: 0.74 to 0.84) (A). The logistic regression predictive score for each patient of the combined cohort (B).
